## Comparison of 2-years follow-up of optimal medical therapy versus balloon pulmonary angioplasty for inoperable chronic thromboembolic pulmonary hypertension

A.R. Pereira, R. Cale, F. Ferreira, S. Alegria, S. Sebaiti, D. Repolho, P. Santos, S. Vitorino, H. Pereira, M.J. Loureiro

Hospital Garcia de Orta, Cardiology, Almada, Portugal

Funding Acknowledgement: Type of funding sources: None.

**Introduction:** Balloon pulmonary angioplasty (BPA) has emerged as a therapeutic option for chronic thromboembolic pulmonary hypertension (CTEPH) considered ineligible for pulmonary endarterectomy (PEA). The initial publications showed very good short-term outcomes for the technique, but there are limited data regarding medium-term outcomes and its comparison with optimal medical treatment (OMT).

**Objectives:** To evaluate and compare the medium-term outcomes of OMT versus (vs) BPA in inoperable CTEPH.

**Methods:** Retrospective study of consecutive patients (pts) with CTEPH followed in a referral centre for Pulmonary Hypertension. Selected those pts considered ineligible for PEA and with at least 2 years of follow-up. Comparison between two treatment strategies: OMT alone [maximum tolerated doses of pulmonary vasodilator drugs (PVD), as indicated] vs BPA (pts who completed the program with or without OMT). Endpoint was a composite of all-cause death and unplanned right heart failure admission at 2-year.

**Results:** From 62 pts, 19 pts were included (11 pts were excluded due to recent diagnosis; 32 were submitted to EAP): mean age 65.0±15.3 years, 89.5% female. At diagnosis, all pts had functional capacity limitation and elevated serum NTproBNP levels (median value 1255.0 pg/mL). Mean pulmonary arterial pressure (mPAP) was 46.2±9.3 mmHg and pulmonary vascular resistance (PVR) 15.3±8.3 Wood units (WU). Concerning treatment, 12 pts (63.2%) underwent OMT alone. These pts had higher NTproBNP

levels (2670.0 vs 538.0 pg/mL,  $p < 0.01$ ) and PVR values ( $19.7 \pm 7.6$  vs  $9.7 \pm 5.4$  WU,  $p = 0.01$ ) and lower CI ( $1.6 \pm 0.3$  vs  $2.4 \pm 0.5$  L/min/m<sup>2</sup>,  $p < 0.01$ ), at baseline; the remaining basal features didn't differ among groups (Fig. A). At 2-year follow-up, pts submitted to BPA were under PVD in 71.4% of cases with a mean of 1±0.8 drugs per patient and no difference compared to OMT group (83.3%,  $1.7 \pm 0.9$  drugs per patient), although oxygen therapy was higher in medical group (50% vs 0%,  $p = 0.04$ ). A significant overall improvement was observed in BPA group (Table – A): all pts were in functional class I ( $p < 0.01$ ), no one had right ventricular dysfunction ( $p < 0.01$ ) and mPAP decreased to  $25.1 \pm 6.7$  mmHg ( $p = 0.01$ ) and RVP to  $2.9 \pm 0.8$  WU ( $p = 0.01$ ). Inversely, no change was observed in pts under OMT alone ( $p > 0.05$  in all, Table – A). Endpoint rate was 31.6% with all adverse events occurring in the OMT group (50% vs 0%,  $p = 0.04$ ). After adjustment by Cox regression, no difference in baseline or follow-up features besides treatment influenced the outcome. Kaplan-Meier analysis (Graphic – B) confirmed significant benefit of BPA in 2-year outcome occurrence (long rank 4.6,  $p = 0.03$ ).

**Conclusions:** BPA strategy seems to improve medium-term functional capacity, right ventricular function and haemodynamics and decrease oxygen therapy dependence in inoperable CTEPH. Pts under OMT alone have a poor prognosis. These data encourage the development and implementation of the technique for inoperable CTEPH.

**A**

**Table. Comparison of 2-years follow-up of optimal medical therapy (OMT) versus balloon pulmonary angioplasty (BPA) for inoperable chronic thromboembolic pulmonary hypertension**

| Variables*                            | Baseline    |             |                      | 2-year follow-up |            |                      | Baseline vs. 2-year follow-up |           |
|---------------------------------------|-------------|-------------|----------------------|------------------|------------|----------------------|-------------------------------|-----------|
|                                       | OMT (n=12)  | BPA (n=7)   | p-value <sup>†</sup> | OMT (n=12)       | BPA (n=7)  | p-value <sup>†</sup> | OMT (n=12)                    | BPA (n=7) |
| <b>Clinical characteristics</b>       |             |             |                      |                  |            |                      |                               |           |
| Age (years)                           | 63.2 ±      | 68.1 ± 8.3  | p = 0.42             |                  |            |                      |                               |           |
| Female Gender (n, %)                  | 18.3        | 5 (71.4%)   | p = 0.12             |                  |            |                      |                               |           |
| Limited functional class (n, %)*      | 12 (100%)   | 4 (57.1%)   | p = 0.04             | 10 (83.3%)       | 0          | p < 0.01             | p = 0.99                      | p < 0.01  |
| 6MWT (m)                              | 12 (100%)   | 312.0       | p = 0.19             | 284.2            | 430.0      | p = 0.01             | p = 0.33                      | p = 0.20  |
| NT-proBNP (pg/mL)                     | 225.3       | 538.0       | p < 0.01             | 2004.0           | 132.0      | p < 0.01             | p = 0.33                      | p = 0.06  |
| 2670.0                                |             |             |                      |                  |            |                      |                               |           |
| <b>Haemodynamics features</b>         |             |             |                      |                  |            |                      |                               |           |
| Mean PAP (mmHg)                       | 47.5 ± 2.6  | 44.4 ± 14.6 | p = 0.60             | 46.5 ± 6.6       | 25.1 ± 6.7 | p < 0.01             | p = 0.92                      | p = 0.01  |
| Mean RAP (mmHg)                       | 9.6 ± 3.8   | 6.4 ± 4.0   | p = 0.14             | 10.0 ± 7.2       | 5.7 ± 2.4  | p = 0.17             | p = 0.77                      | p = 0.61  |
| PVR (uWood)                           | 19.7 ± 7.6  | 9.7 ± 5.4   | p = 0.01             | 13.3 ± 6.8       | 2.9 ± 0.8  | p = 0.05             | p = 0.23                      | p = 0.01  |
| Cardiac output (L/min)                | 2.9 ± 1.0   | 4.4 ± 1.1   | p = 0.01             | 3.7 ± 0.5        | 5.0 ± 1.3  | p = 0.09             | p = 0.38                      | p = 0.21  |
| Cardiac index (L/min/m <sup>2</sup> ) | 1.6 ± 0.3   | 2.4 ± 0.5   | p < 0.01             | 2.2 ± 0.3        | 2.6 ± 0.5  | p = 0.12             | p = 0.12                      | p = 0.36  |
| SvO <sub>2</sub> (%)                  | 58.8 ± 12.5 | 69.3 ± 12.6 | p = 0.16             | 66.1 ± 2.8       | 70.4 ± 4.7 | p = 0.19             | p = 0.99                      | p = 0.28  |
| <b>Echocardiographic features</b>     |             |             |                      |                  |            |                      |                               |           |
| RV dysfunction (n, %)                 | 6 (50%)     | 3 (42.9%)   | p = 0.64             | 5 (41.7%)        | 0          | p = 0.02             | p = 0.08                      | p < 0.01  |

\* Functional Classification according World Health Organization: I – without limitation of physical activity; II – slight limitation of physical activity; III – marked limitation of physical activity; IV – inability to carry out any physical activity without symptoms.

† Continuous variables are expressed as mean ± standard deviation with exception of NT-proBNP and 6MWT expressed as median

‡ After adjustment by Cox regression, no difference in baseline or follow-up features besides treatment influenced the outcome

BPA – Balloon Pulmonary Angioplasty; OMT – Optimal Medical Treatment; NT-proBNP – N-terminal pro-brain natriuretic peptide; PAP – Pulmonary Artery Pressure; PVR – Pulmonary Vascular Resistance; RAP – Right atrial pressure; RA – Right atrial; RV – Right ventricular; 6MWT – Six-minute walking test; SvO<sub>2</sub> – Mixed venous oxygen saturation.

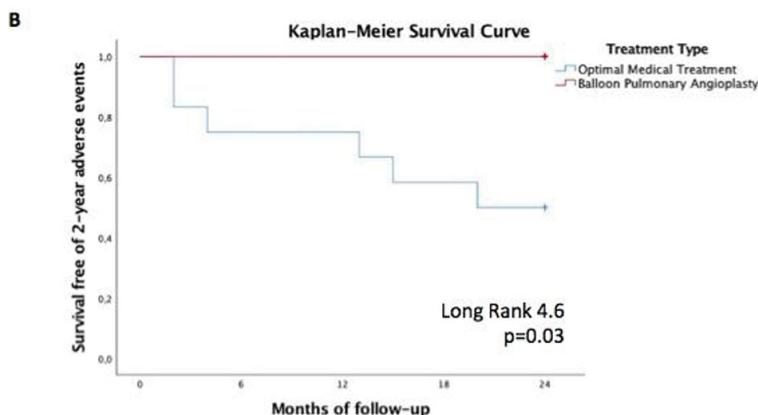

Source: http://academic.oup.com/eurheartj/article-pdf/42/Supplement_1/ehab724.1915/40591168/ehab724.1915.pdf
